# Supplementary material
Source: HighWire-hosted journal article supplement (https://bjo.bmj.com/content/103/2/233)
Supplement: inline-supplementary-material-1 [file inline-supplementary-material-1.pdf]

**Supplementary table 1. Estimates of agreement for all variables assessed by the two graders**

| <b>Variable</b>                                                                                     | <b>Kappa (95% CI)</b> | <b>Percent Agreement (%)</b> |
|-----------------------------------------------------------------------------------------------------|-----------------------|------------------------------|
| Pre-treatment retinal ganglion cysts (RGC) present within 3600 microns of the fovea                 | 0.64 (0.36, 0.88)     | 86.05                        |
| Pre-treatment inner nuclear layer (INL) cysts present within 3600 microns of the fovea              | -                     | 97.67                        |
| Pre-treatment outer nuclear layer (ONL) cysts present within 3600 microns of the fovea              | 0.51 (0.28, 0.76)     | 81.40                        |
| Pre-treatment sub-retinal fluid (SRF) present within 3600 microns of the fovea                      | -                     | 100%                         |
| Pre-treatment external limiting membrane (ELM) present within 1200 microns of the fovea             | 0.76 (0.46, 1)        | 93.02                        |
| Pre-treatment external limiting membrane (ELM) intact or disrupted within 1200 microns of the fovea | 0.81 (0.62, 1)        | 90.7                         |
| Pre-treatment fluid present in any layer directly under the fovea                                   | 0.71 (0.46, 0.92)     | 88.37                        |
| Pre-treatment ELM present directly under the fovea                                                  | 0.7 (0.45, 0.94)      | 88.37                        |
| Pre-treatment epi-retinal membrane (ERM) present within 3600 microns of the fovea                   | 0.22 (0.11, 0.4)      | 44.19                        |
| Pre-treatment vitreo-macular adhesion (VMA) present within 3600 microns of the fovea                | 0.66 (0.39, 0.89)     | 88.37                        |
| Pre-treatment vitreo-macular traction (VMT) present within 3600 microns of the fovea                | -                     | 100                          |

|                                                                                                      |                   |       |
|------------------------------------------------------------------------------------------------------|-------------------|-------|
| Pre-treatment lamellar hole present within 3600 microns of the fovea                                 | -                 | 100   |
| Pre-treatment full-thickness macular hole (FTMH) present within 3600 microns of the fovea            | -                 | 100   |
| Post-treatment retinal ganglion cysts (RGC) present within 3600 microns of the fovea                 | 0.62 (0.33, 0.85) | 86.05 |
| Post-treatment inner nuclear layer (INL) cysts present within 3600 microns of the fovea              | 0.79 (0.46, 1)    | 95.35 |
| Post-treatment outer nuclear layer (ONL) cysts present within 3600 microns of the fovea              | 0.45 (0.3, 0.63)  | 67.44 |
| Post-treatment sub-retinal fluid (SRF) present within 3600 microns of the fovea                      | -                 | 100%  |
| Post-treatment external limiting membrane (ELM) present within 1200 microns of the fovea             | 0.55 (0.26, 0.84) | 86.05 |
| Post-treatment external limiting membrane (ELM) intact or disrupted within 1200 microns of the fovea | 0.72 (0.47, 0.9)  | 86.05 |
| Post-treatment fluid present in any layer directly under the fovea                                   | 0.76 (0.55, 0.95) | 88.37 |
| Post-treatment ELM present directly under the fovea                                                  | 0.64 (0.38, 0.89) | 86.05 |
| Post-treatment epi-retinal membrane (ERM) present within 3600 microns of the fovea                   | 0.14 (0.04, 0.27) | 34.88 |
| Post-treatment vitreo-macular adhesion (VMA) present within 3600 microns of the fovea                | 0.58 (0.26, 0.85) | 86.05 |
| Post-treatment vitreo-macular traction (VMT) present within                                          | -                 | 97.67 |

|                                                                                            |                    |       |
|--------------------------------------------------------------------------------------------|--------------------|-------|
| 3600 microns of the fovea                                                                  |                    |       |
| Post-treatment lamellar hole present within 3600 microns of the fovea                      | 0.49 (0.48, 0.49)* | 97.67 |
| Post-treatment full-thickness macular hole (FTMH) present within 3600 microns of the fovea | -                  | 100   |
